# Supplementary material for: The reversible inter-conversion of copper(ii) dimers bearing phenolate-based ligands in their monomers: theoretical and experimental viewpoints
Source: Royal Society of Chemistry journal article supplement (doi:10.1039/d0nj00484g), 2020-12-08
Supplement: d0nj00484g1.pdf [file d0nj00484g1.pdf]

## Electronic Supporting Information

### Reversible inter-conversion of copper(II) dimers bearing phenolate-based ligands into their monomers: Theoretical and Experimental Visions

Pratibha Agarwal <sup>a,#</sup>, Akhilesh Kumar <sup>b,#</sup>, Richa <sup>a</sup>, Indresh Verma <sup>b</sup>, Rohan D. Erande <sup>c</sup>, Julia Klak<sup>\*,d</sup>,  
Antonio J. Mota<sup>\*,e</sup>, Amit Rajput<sup>\*,a</sup>, and Himanshu Arora <sup>\*,a</sup>

---

<sup>a</sup>School of Engineering and Sciences, G.D. Goenka University, Gurugram, India. E-mail:  
himanshuiitk2004@gmail.com, +91 8860185079.

<sup>b</sup>Department of Chemistry, Indian Institute of Technology Kanpur, Kanpur 208 016, India

<sup>c</sup>Indian Institute of Technology Jodhpur, Jodhpur 342037, India.

<sup>d</sup>Faculty of Chemistry, University of Wrocław, Wrocław 50-383, Poland.

<sup>e</sup>Department of Inorganic Chemistry, Faculty of Science, University of Granada, 18071, Granada,  
Spain.

<sup>f</sup>Department of Chemistry, Axis Institute of Technology & Management Kanpur, Kanpur, India

<sup>#</sup>Both the authors have equal contribution.

1. Perspective view of complex **2** Fig. S1
2. Perspective view of complex **4** Fig. S2
3. Temperature dependence of experimental  $\chi_m T$  ( $\chi_m$  per 1 Cu<sup>II</sup> atom) for **3** and **4**  
Fig. S3
4. Field dependence of the magnetization ( $M$  per Cu<sub>2</sub> entities) for **1** and **2**  
Fig. S4
5. Field dependence of the magnetization ( $M$  per Cu<sub>2</sub> entities) for **3** and **4**.  
Fig. S5
6. EPR (X-band) spectra of powdered samples **3** and **4** at 77 K Fig. S6
7. Bond lengths and angles of 1-4. Table S1
8. Spin density values for selected atoms on complexes **1** and **2** Table S2
9. Electronic properties of the metal complexes in CH<sub>3</sub>CN solution Table S3
10. UV-Vis of **1-4** in CH<sub>3</sub>CN Fig. S7-S10
11. UV-Vis of HL<sup>1</sup> and HL<sup>2</sup> in CH<sub>3</sub>CN Fig. S11
12. Cyclic Voltammogram of [Cu<sub>2</sub>L<sup>1</sup><sub>2</sub>] and [Cu<sub>2</sub>L<sup>2</sup><sub>2</sub>] in CH<sub>3</sub>CN Fig. S12
13. Cyclic Voltammogram of **3** and **4** in CH<sub>3</sub>CN Fig. S13

14. Spectral change of the titration of  $[\text{Cu}_2\text{L}^2_2]$  ( $1.0 \times 10^{-3}$  M) by pyridine (0 – 0.004 M) in  $\text{CH}_3\text{CN}$  Fig. S14
15. ESR spectra of (a)  $[\text{CuL}^1(\text{py})]^+$  and (b)  $[\text{CuL}^2(\text{py})]^+$  generated from the dimer by adding pyridine Fig. S15
16. Schematic pathway for the monomer to dimer conversion for the thermodynamic process Fig. S16
17. Spectral change of the titration of  $[\text{Cu}_2\text{L}^2_2](\text{ClO}_4)_2$  ( $1.0 \times 10^{-3}$  M) by  $\text{HClO}_4$  (0–2.5 eq.) in  $\text{CH}_3\text{CN}$  Fig. S17
18. Spectral change of the titration of  $[\text{CuL}^2(\text{CH}_3\text{CN})(\text{OCIO}_3)(\text{ClO}_4)]$  ( $1.0 \times 10^{-3}$  M) by  $\text{Et}_3\text{N}$  (0–1 eq.) in  $\text{CH}_3\text{CN}$  Fig. S18

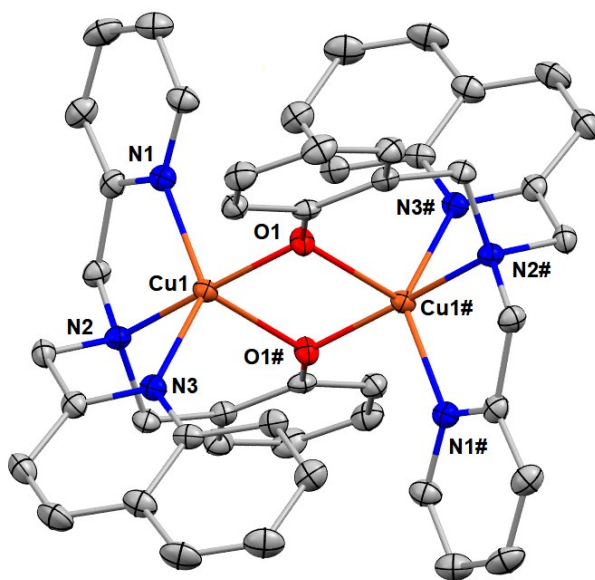

**Fig. S1** Perspective view of the structure of  $[\text{Cu}_2(\text{L}^2)_2](\text{ClO}_4)_2 \cdot \text{CH}_3\text{CN}$  (**2**). Only donor atoms are labeled. All the hydrogen atoms are omitted for clarity.

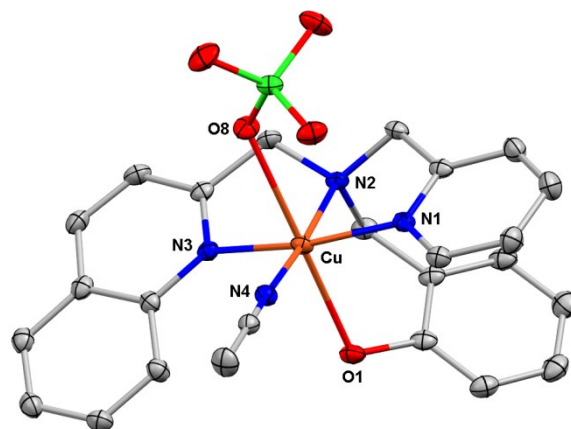

**Fig. S2** Perspective view of the structure of  $[\text{Cu}(\text{HL}^2)(\text{NCCH}_3)(\text{OCIO}_3)](\text{ClO}_4) \cdot \text{CH}_3\text{CN}$  (**4**). Only donor atoms are labeled. All the hydrogen atoms are omitted for clarity.

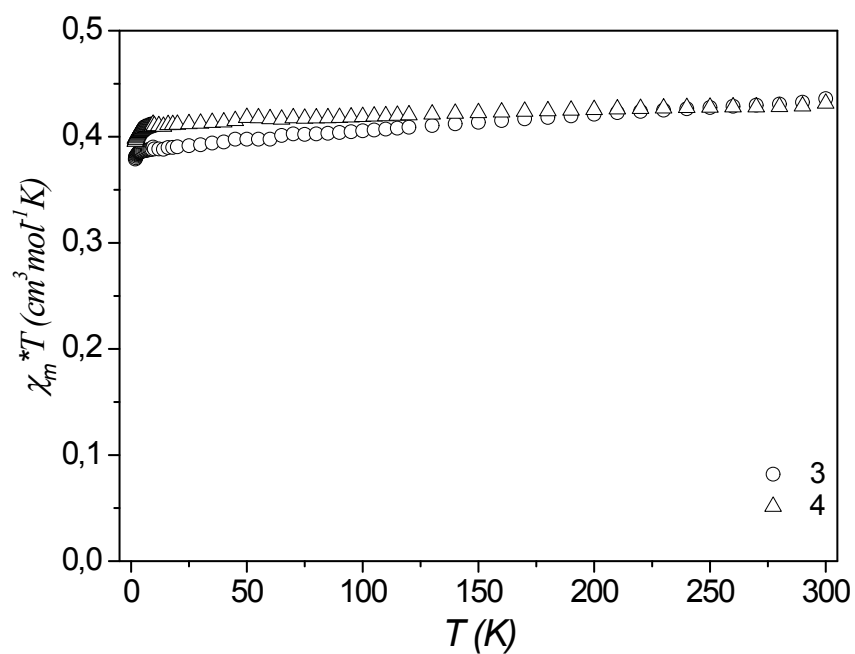

**Fig. S3** Temperature dependence of experimental  $\chi_m T$  ( $\chi_m$  per 1  $\text{Cu}^{\text{II}}$  atom) for **3** and **4**.

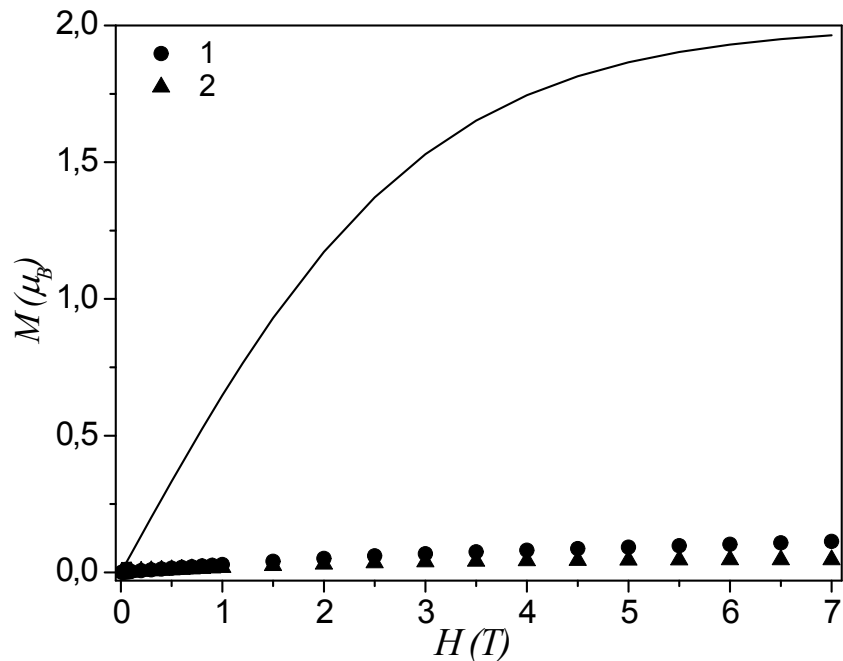

**Fig. S4** Field dependence of the magnetization ( $M$  per  $\text{Cu}_2$  entities) for **1** and **2**. The solid line is the Brillouin function curve for the system of two uncoupled spins with  $S = 1/2$  and  $g = 2.0$ .

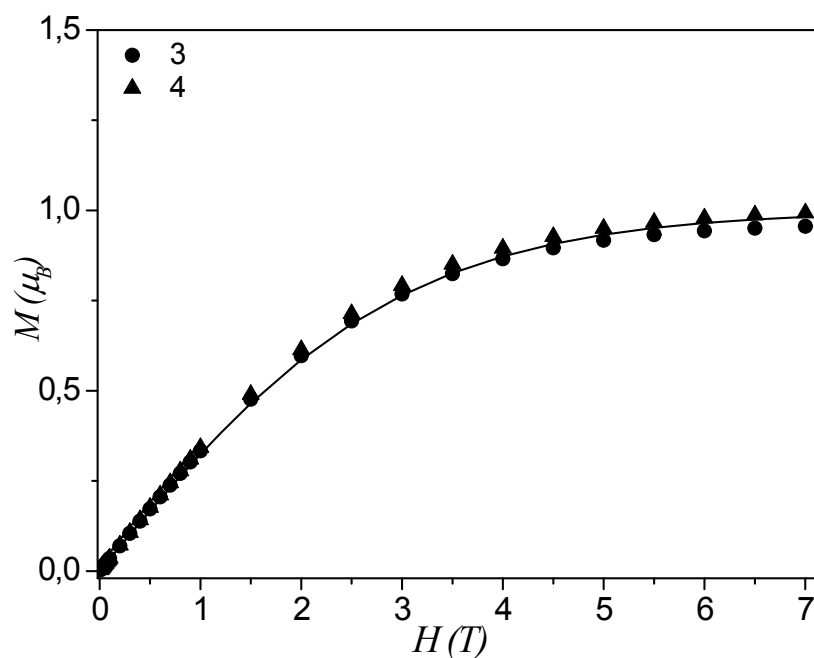

**Fig. S5** Field dependence of the magnetization ( $M$  per 1  $\text{Cu}^{\text{II}}$  atom) for **3** and **4**. The solid line is the Brillouin function curve for one uncoupled spin with  $S = 1/2$  and  $g = 2.0$ .

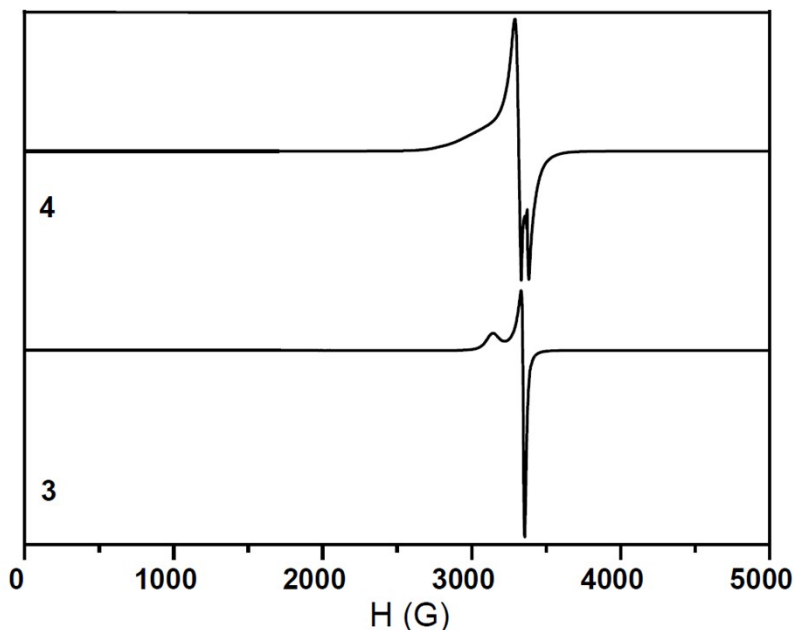

**Fig. S6** EPR (X-band) spectra of powdered samples **3** and **4** at 77 K.

Table S1. Selected Bond Lengths (Å), and Angles (°) in  $[\text{Cu}_2(\text{L}^1)_2](\text{ClO}_4)_2 \cdot 2\text{CH}_3\text{CN}$  (**1**),  $[\text{Cu}_2(\text{L}^2)_2](\text{ClO}_4)_2 \cdot \text{CH}_3\text{CN}$  (**2**),  $[\text{Cu}(\text{HL}^1)(\text{NCCH}_3)](\text{ClO}_4)_2$  (**3**) and  $[\text{Cu}(\text{HL}^2)(\text{NCCH}_3)(\text{OCIO}_3)](\text{ClO}_4) \cdot \text{CH}_3\text{CN}$  (**4**).

| <b>1</b>          |            |                  |           |
|-------------------|------------|------------------|-----------|
| N(3)–Cu–N(2)#     | 83.9(2)    | N(3)–Cu–N(1)#    | 144.4(2)  |
| N(2)–Cu–O(1)#     | 91.09(19)  | N(1)–Cu–O(1)#    | 102.4(2)  |
| N(1)–Cu–N(2)#     | 80.1(2)    |                  |           |
| # [1–x, 1–y, 1–z] |            |                  |           |
| <b>2</b>          |            |                  |           |
| Cu(2)–O(2)        | 1.9270(18) | N(1)–Cu(1)–N(3)# | 134.83(9) |
| Cu(2)–O(2)\$      | 2.1074(19) | N(2)–Cu(1)–O(1)# | 92.09(8)  |
| Cu(2)–N(4)        | 2.014(2)   | N(2)–Cu(1)–N(1)# | 82.64(9)  |
| Cu(2)–N(5)        | 2.003(2)   | N(2)–Cu(1)–N(3)# | 80.95(9)  |
| Cu(2)–N(6)        | 2.088(2)   | N(3)–Cu(1)–O(1)# | 104.76(8) |

|                                       |            |                   |            |
|---------------------------------------|------------|-------------------|------------|
| Cu(2)···Cu(2)\$                       | 3.0946(6)  | N(4)–Cu(2)–N(6)\$ | 137.65(9)  |
|                                       |            | N(5)–Cu(2)–O(2)\$ | 92.04(8)   |
|                                       |            | N(5)–Cu(2)–N(6)\$ | 82.32(9)   |
|                                       |            | N(6)–Cu(2)–O(2)\$ | 109.05(8)  |
|                                       |            | N(5)–Cu(2)–N(4)\$ | 83.09(9)   |
|                                       |            | Cu(2)–O(2)–Cu(2)  | 100.09(8)  |
| # [1–x, 1–y, 1–z], \$ [1–x, 1–y, 2–z] |            |                   |            |
| <b>3</b>                              |            |                   |            |
| N(4)–Cu–O(1)                          | 106.34(12) | N(3)–Cu–N(4)      | 82.13(13)  |
| N(5)–Cu–O(1)                          | 87.06(12)  | N(3)–Cu–N(5)      | 176.19(13) |
| N(4)–Cu–N(5)                          | 94.95(13)  |                   |            |
| <b>4</b>                              |            |                   |            |
| N(4)–Cu–O(1)                          | 96.97(7)   | N(3)–Cu–N(4)      | 100.29(8)  |
| N(2)–Cu–O(1)                          | 90.53(7)   | N(2)–Cu–N(3)      | 81.77(8)   |
| N(2)–Cu–N(4)                          | 172.16(8)  |                   |            |

**Table S2.** Spin density values for selected atoms on complexes **1** and **2**.

| Complex                           | <b>1</b> | <b>2a</b> | <b>2b</b> |
|-----------------------------------|----------|-----------|-----------|
| Cu <sup>a</sup>                   | 0.6290   | 0.6221    | 0.6213    |
| O <sub>bridge</sub> <sup>b</sup>  | 0.0977   | 0.0861    | 0.0785    |
| N <sub>im/quin</sub> <sup>b</sup> | 0.0683   | 0.0491    | 0.0426    |
| N <sub>tert</sub> <sup>b</sup>    | 0.1205   | 0.1328    | 0.1372    |
| N <sub>py</sub> <sup>b</sup>      | 0.0654   | 0.0739    | 0.0753    |

<sup>a</sup> Only a half of each structure is shown because they are centrosymmetric. All values on the same half have the same sign and opposite sign with respect to the other half. <sup>b</sup> Directly attached atoms in the magnetic orbital plane: O<sub>bridge</sub> is the oxygen bridging atom in the magnetic orbital plane, N<sub>im/quin</sub> is the imidazolic nitrogen atom in complex **1** and quinolinic in complex **2**, N<sub>tert</sub> is the aminic, tertiary nitrogen atom, and N<sub>py</sub> corresponds to the pyridinic nitrogen atom.

**Table S3.** Absorption spectra of the metal complexes in CH<sub>3</sub>CN solution

| Complex                                                                                                             | $\lambda_{\text{max}}/\text{nm}$ ( $\epsilon/\text{M}^{-1} \text{cm}^{-1}$ ) |
|---------------------------------------------------------------------------------------------------------------------|------------------------------------------------------------------------------|
| [Cu <sub>2</sub> (L <sup>1</sup> ) <sub>2</sub> ](ClO <sub>4</sub> ) <sub>2</sub> •2CH <sub>3</sub> CN ( <b>1</b> ) | 293 (17600), 460sh (560), 870 (600)                                          |
| [Cu <sub>2</sub> (L <sup>2</sup> ) <sub>2</sub> ](ClO <sub>4</sub> ) <sub>2</sub> •CH <sub>3</sub> CN ( <b>2</b> )  | 320sh (9680), 460sh (390), 870 (370)                                         |
| [Cu(HL <sup>1</sup> )(NCCH <sub>3</sub> )](ClO <sub>4</sub> ) <sub>2</sub> ( <b>3</b> )                             | 272 (17200), 615 (120)                                                       |
| [Cu(HL <sup>2</sup> )(NCCH <sub>3</sub> )(OCIO <sub>3</sub> )](ClO <sub>4</sub> )•CH <sub>3</sub> CN ( <b>4</b> )   | 320sh (8500), 615 (130)                                                      |
| [CuL <sup>1</sup> (py)] <sup>+</sup>                                                                                | 470 (700), 730 (250)                                                         |
| [CuL <sup>2</sup> (py)] <sup>+</sup>                                                                                | 470 (1150), 660 (350)                                                        |
| HL <sup>1</sup>                                                                                                     | 287 (25000), 290 (12000)                                                     |
| HL <sup>2</sup>                                                                                                     | 302 (15000), 315 (17000)                                                     |

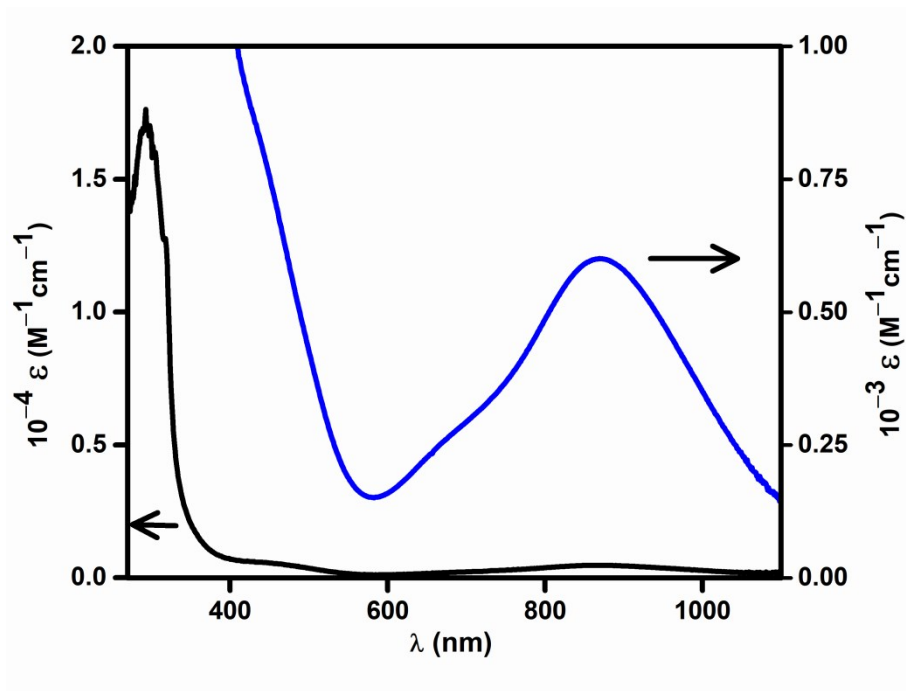

Fig S7. UV-Vis of [Cu<sub>2</sub>(L<sup>1</sup>)<sub>2</sub>](ClO<sub>4</sub>)<sub>2</sub>•2CH<sub>3</sub>CN (**1**) in CH<sub>3</sub>CN

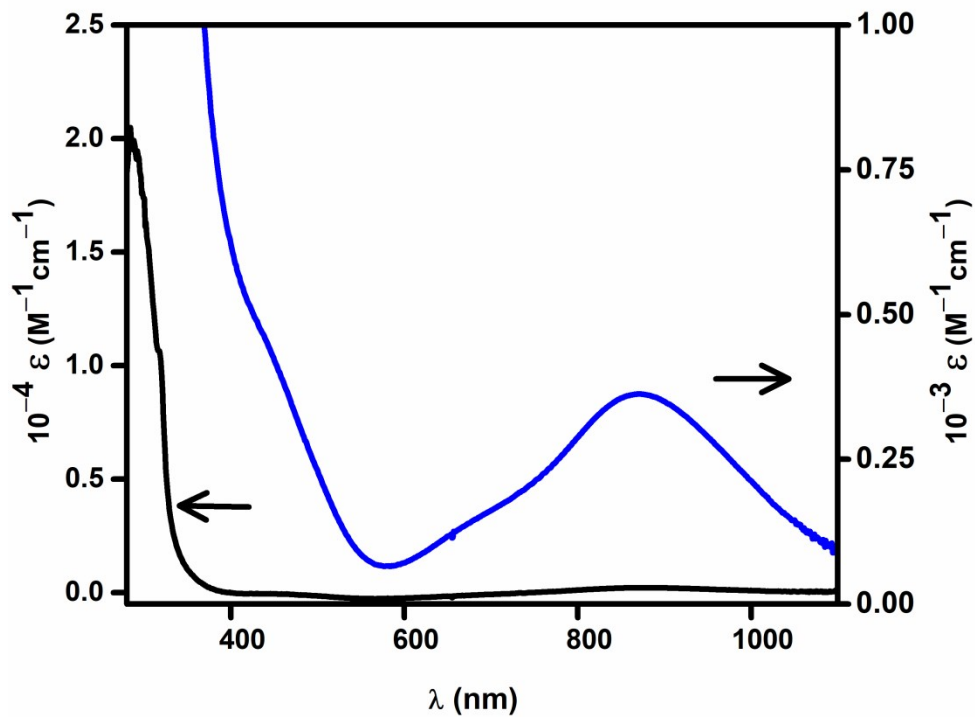

Fig S8. UV-Vis of  $[\text{Cu}_2(\text{L}^2)_2](\text{ClO}_4)_2 \cdot \text{CH}_3\text{CN}$  (**2**) in  $\text{CH}_3\text{CN}$

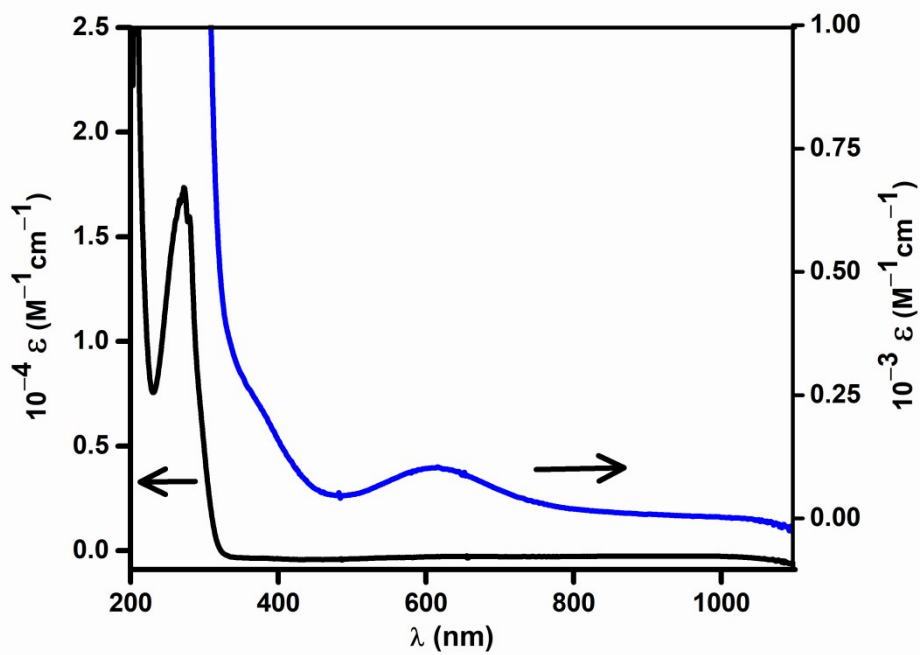

Fig S9. UV-Vis of  $[\text{Cu}(\text{HL}^1)(\text{NCCH}_3)](\text{ClO}_4)_2$  (**3**) in  $\text{CH}_3\text{CN}$



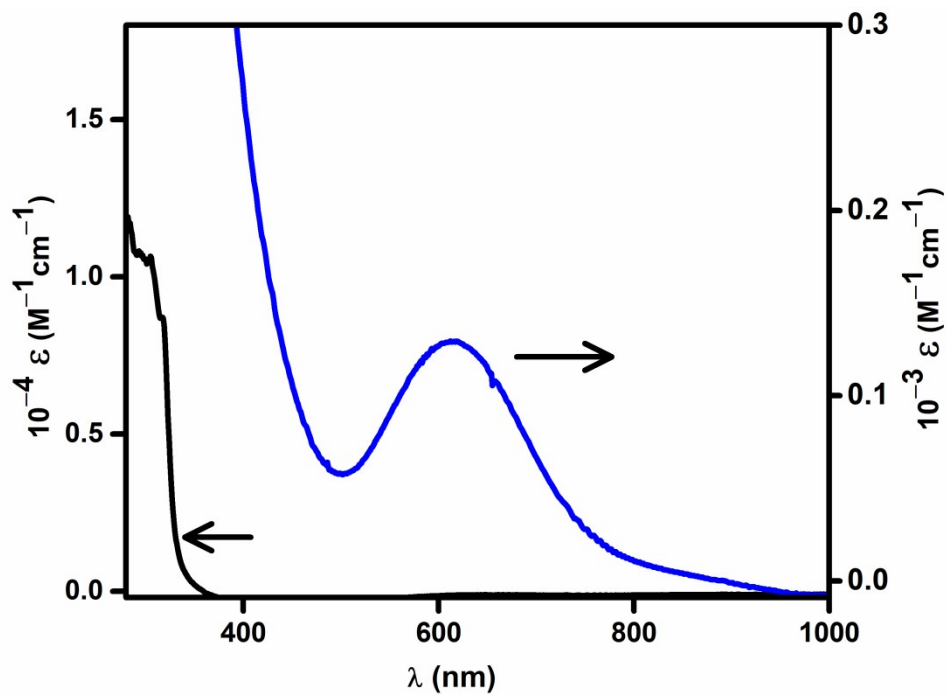

Fig S10. UV-Vis of  $[\text{Cu}(\text{HL}^2)(\text{NCCH}_3)(\text{OCIO}_3)](\text{ClO}_4) \cdot \text{CH}_3\text{CN}$  (**4**) in  $\text{CH}_3\text{CN}$

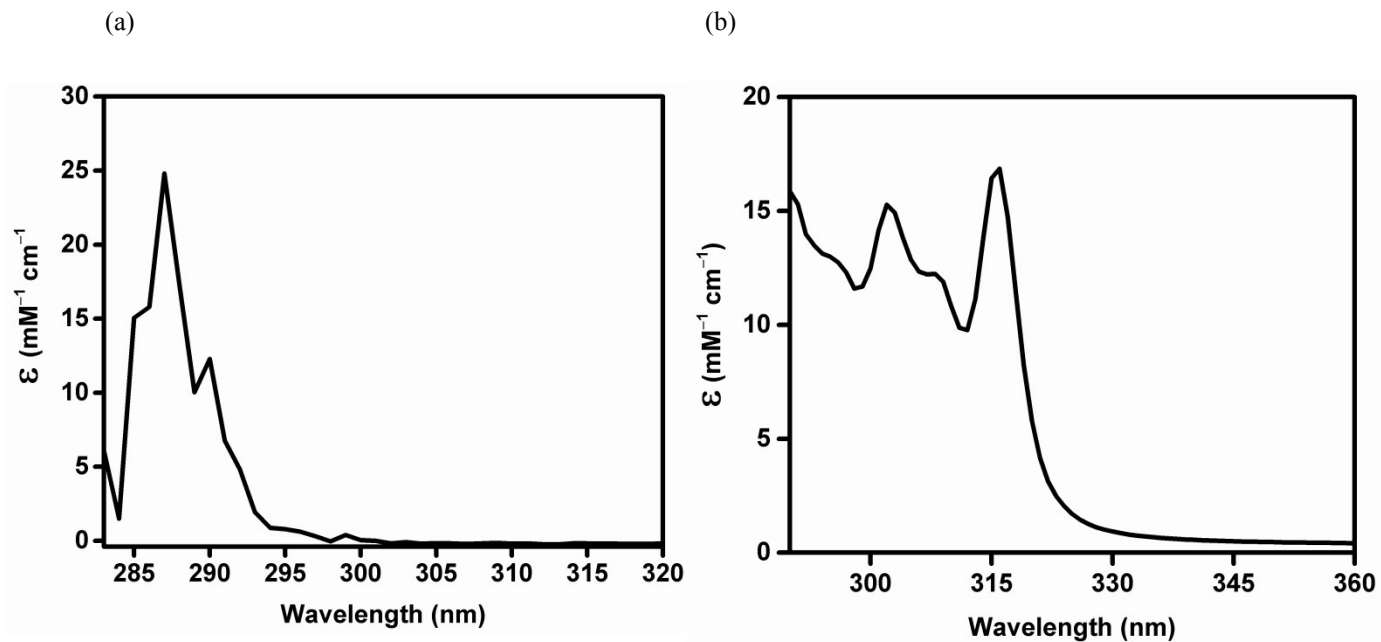

Fig S11. UV-Vis of (a)  $\text{HL}^1$  and (b)  $\text{HL}^2$  in  $\text{CH}_3\text{CN}$

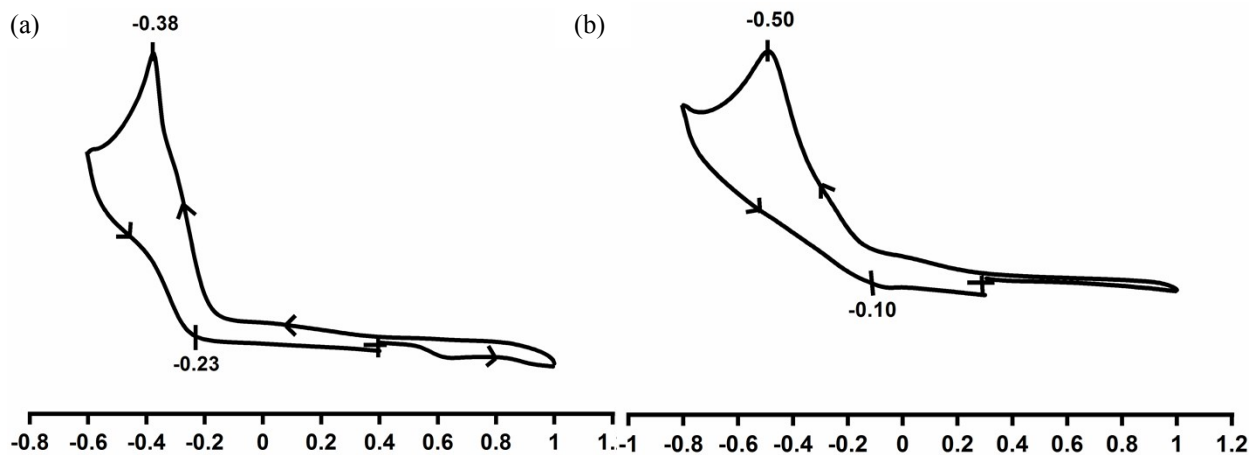

Fig. S12 Cyclic voltammogram (100 mV/s) of 1 mM solution of (a) **1** at GC electrode and (b) **2** at platinum electrode in CH<sub>3</sub>CN (0.1 M in TBAP). Indicated peak potentials are in V vs. Ag<sup>+</sup>/AgCl.

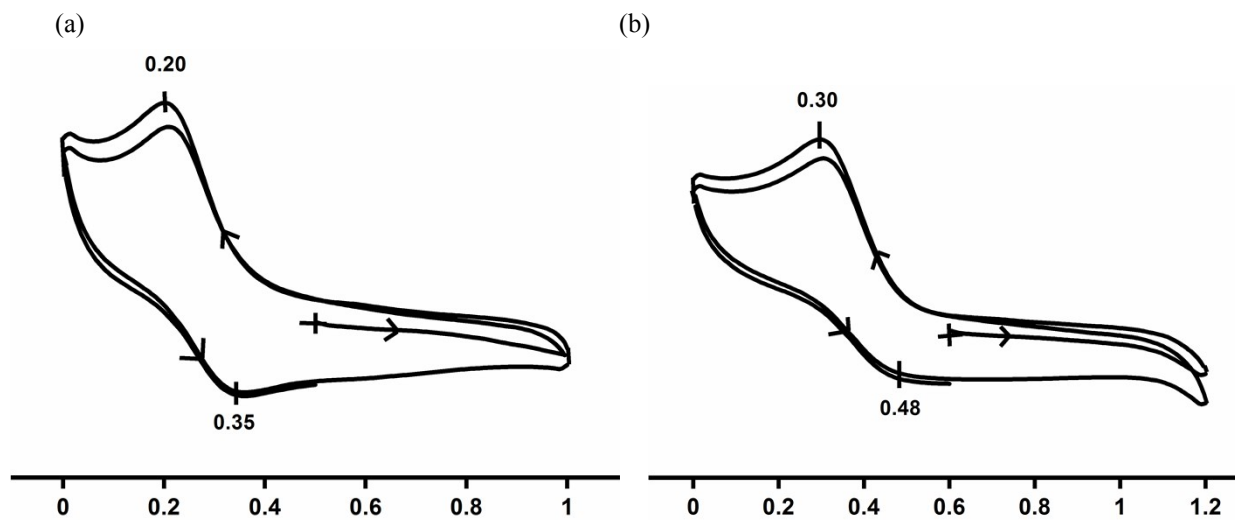

Fig. S13 Cyclic voltammogram (100 mV/s) of 1 mM solution of (a) **3** at GC electrode and (b) **4** at platinum electrode in CH<sub>3</sub>CN (0.1 M in TBAP). Indicated peak potentials are in V vs. Ag<sup>+</sup>/AgCl.

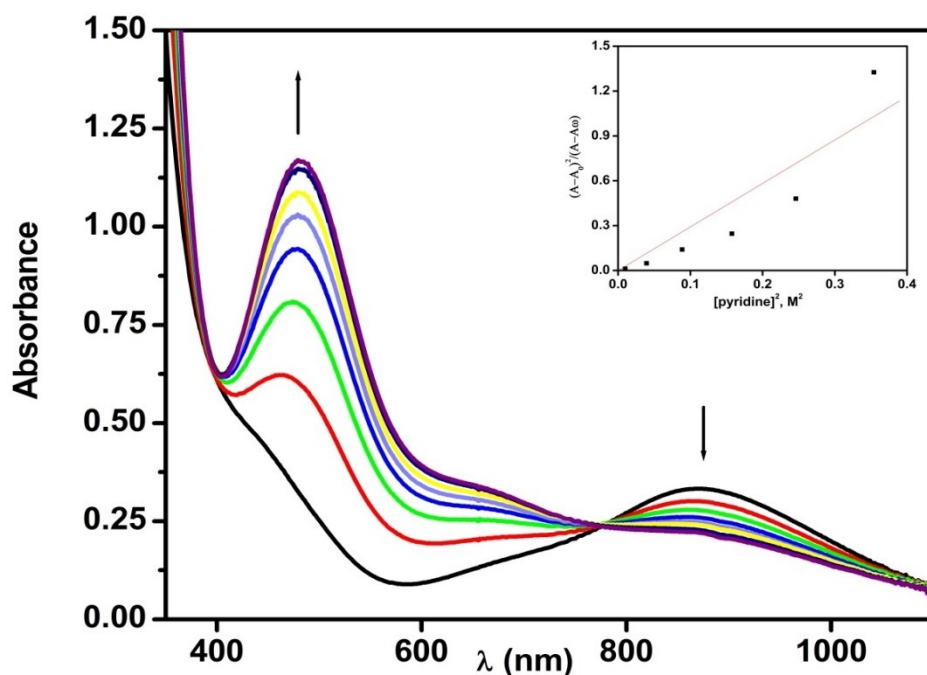

**Fig. S14** Spectral change of the titration of  $[\text{Cu}_2\text{L}^2_2]$  ( $1.0 \times 10^{-3}$  M) by pyridine (0 – 0.004 M) in  $\text{CH}_3\text{CN}$ . Inset: plot of  $(A - A_0)^2 / (A - A_\infty)$  vs.  $[\text{pyridine}]_2$  for the titration. Black line:  $[\text{Cu}_2\text{L}^1_2]^{2+}$  and other lines:  $[\text{Cu}_2\text{L}^1_2]^{2+}$  with incremental addition of pyridine.

(a)

(b)

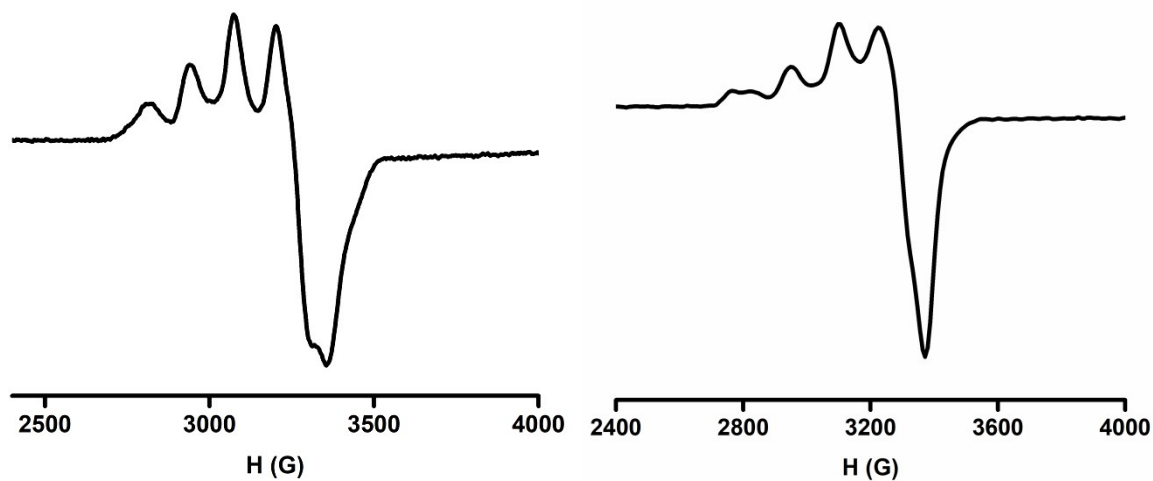

**Fig. S15** ESR spectra of (a)  $[\text{CuL}^1(\text{py})]^+$  and (b)  $[\text{CuL}^2(\text{py})]^+$  generated from the dimer ( $10^{-3}$  M) by adding pyridine ( $4 \times 10^{-3}$  M) in  $\text{CH}_3\text{CN}$  at 120 K; microwave frequency 9.414 GHz, modulation frequency 100 kHz, modulation amplitude 5 G, microwave power 6.31 mW.

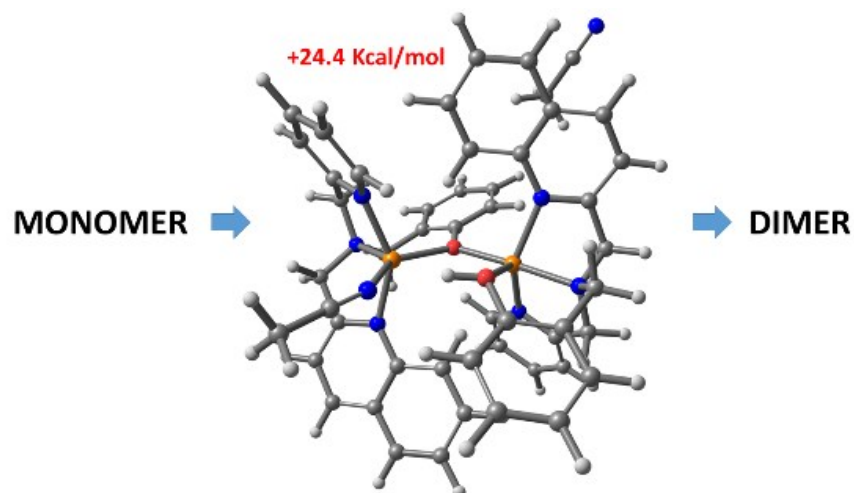

**Fig. S16** Schematic pathway for the monomer to dimer conversion for the thermodynamic process:  $2\text{Et}_3\text{N} + 2[\text{CuL}^2(\text{CH}_3\text{CN})]^{2+}$  (monomer)  $\rightarrow$   $\text{Et}_3\text{N} + \text{Et}_3\text{NH}^+ + \text{Dimeric intermediate} \rightarrow 2\text{Et}_3\text{NH}^+ + [\text{Cu}_2\text{L}^2_2]^{2+}(\text{CH}_3\text{CN})_2$  (dimer).

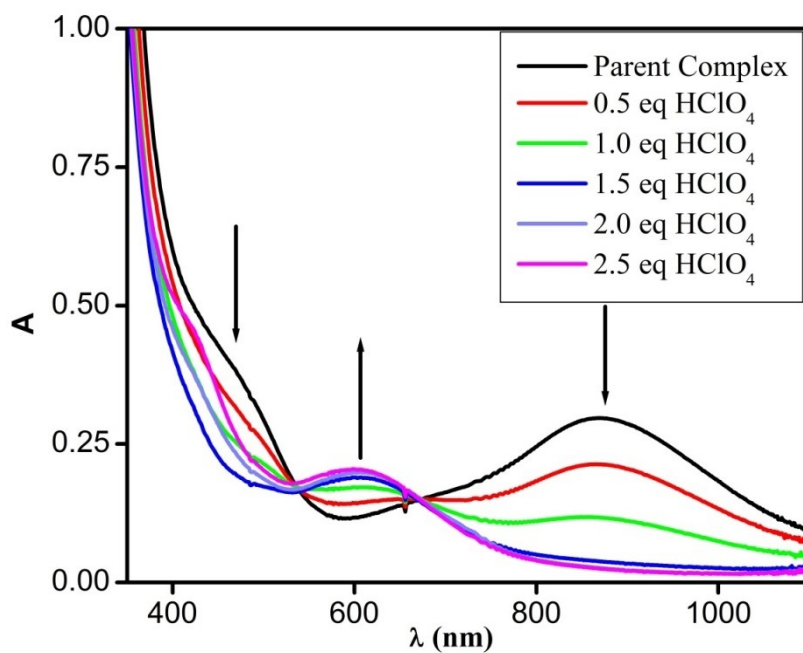

**Fig. S17** Spectral change of the titration of  $[\text{Cu}_2\text{L}^2_2](\text{ClO}_4)_2$  ( $1.0 \times 10^{-3}$  M) by  $\text{HClO}_4$  (0–2.5 eq.) in  $\text{CH}_3\text{CN}$ .

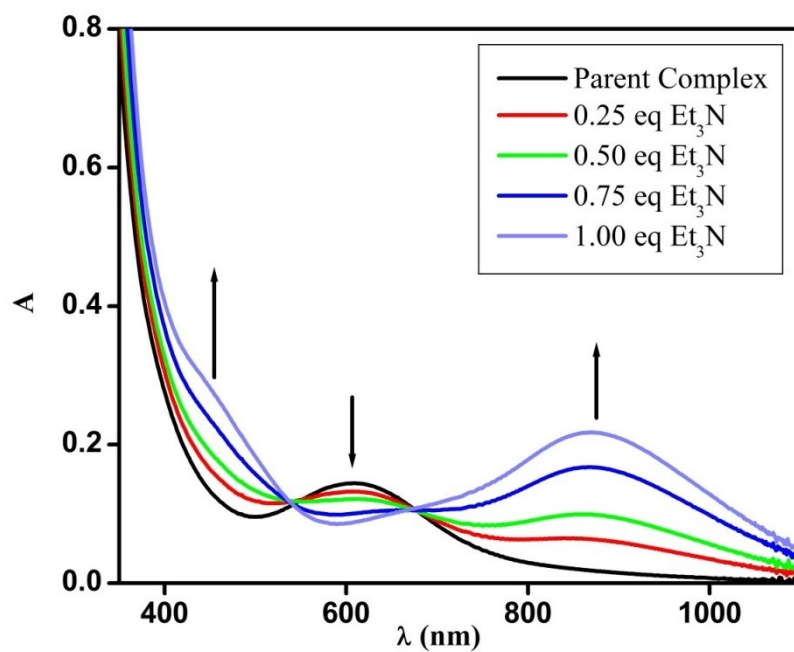

**Fig. S18** Spectral change of the titration of  $[\text{CuL}^2(\text{CH}_3\text{CN})(\text{OCIO}_3)(\text{ClO}_4)]$  ( $1.0 \times 10^{-3}$  M) by  $\text{Et}_3\text{N}$  (0–1 eq.) in  $\text{CH}_3\text{CN}$ .
